# Supplementary material
Source: PubMed Central journal article supplement (PMC3502927)
Supplement: AEM.01814-12_zam999103931so1.pdf [file AEM.01814-12_zam999103931so1.pdf]

TABLE S1: Table of total cell counts (TCC) and total cell numbers for all probes (beside ALF968 and CF6-1267) and all days.

|              | Day      | TCC      | $\sigma$ TCC    | EUB I-III  | $\sigma$ EUB I-III  | SAR11 441 | $\sigma$ SAR11 441 | ROSS37   | $\sigma$ ROS 537 | ROCT1004 | $\sigma$ ROCT1004 | RCA 1000 | $\sigma$ RCA 1000 |
|--------------|----------|----------|-----------------|------------|---------------------|-----------|--------------------|----------|------------------|----------|-------------------|----------|-------------------|
| IN Stations  | -1       | 1,13E+06 | 1,57E+05        | 9,56E+05   | 5.30E+04            | 5,45E+05  | 5.86E+03           | 9,62E+04 | 1.51E+04         | 2,44E+04 | 2.31E+03          | 6,29E+04 | 7.98E+03          |
|              | 5        | 1,22E+06 | 1,70E+05        | 1,01E+06   | 9.48E+04            | 5,82E+05  | 6.70E+04           | 1,32E+05 | 7.58E+04         | 2,86E+04 | 1.98E+04          | 5,80E+04 | 5.16E+04          |
|              | 9        | 1,15E+06 | 9,75E+04        | 1,02E+06   | 9.20E+03            | 5,12E+05  | 2.51E+04           | 9,35E+04 | 7.87E+03         | 3,14E+04 | 6.69E+03          | 5,82E+04 | 6.88E+03          |
|              | 14       | 1,05E+06 | 7,49E+04        | 8,74E+05   | 8.21E+03            | 6,13E+05  | 1.95E+04           | 8,80E+04 | 1.55E+04         | 3,57E+04 | 8.72E+03          | 5,83E+04 | 1.72E+04          |
|              | 18       | 1,40E+06 | 7,12E+04        | 1,25E+06   | 1.93E+04            | 7,65E+05  | 7.19E+04           | 1,32E+05 | 2.92E+04         | 3,41E+04 | 4.14E+03          | 6,54E+04 | 9.15E+03          |
|              | 22       | 1,32E+06 | 3,67E+04        | 1,14E+06   | 7.13E+04            | 7,09E+05  | 3.03E+04           | 1,20E+05 | 2.77E+04         | 3,33E+04 | 5.23E+03          | 5,95E+04 | 1.77E+04          |
|              | 27       | 1,25E+06 | 6,12E+04        | 1,08E+06   | 5.21E+04            | 6,56E+05  | 6.09E+04           | 8,56E+04 | 8.30E+03         | 2,75E+04 | 3.24E+03          | 5,44E+04 | 1.67E+03          |
| 36           | 1,31E+06 | 4,93E+04 | 9,04E+05        | 4.39E+04   | 6,68E+05            | 2.33E+04  | 9,24E+04           | 2.88E+04 | 3,61E+04         | 2.11E+04 | 5,21E+04          | 1.09E+04 |                   |
| OUT Stations | -1       | 1,13E+06 | 1,57E+05        | 9,56E+05   | 5.30E+04            | 5,45E+05  | 5.86E+03           | 9,62E+04 | 1.51E+04         | 2,44E+04 | 2.31E+03          | 6,29E+04 | 7.98E+03          |
|              | 4        | 1,20E+06 | 7,65E+04        | 9,92E+05   | 6.17E+04            | 6,36E+05  | 3.23E+04           | 6,78E+04 | 5.01E+03         | 1,89E+04 | 5.48E+03          | 5,49E+04 | 1.09E+04          |
|              | 8        | 6,56E+05 | 9,41E+04        | 5,36E+05   | 1.94E+04            | 3,14E+05  | 2.29E+04           | 4,09E+04 | 4.92E+03         | 2,97E+04 | 2.33E+04          | 3,27E+04 | 5.84E+03          |
|              | 16       | 1,18E+06 | 3,21E+04        | 1,04E+06   | 2.03E+04            | 6,34E+05  | 3.40E+04           | 7,34E+04 | 7.55E+03         | 2,42E+04 | 4.01E+03          | 6,49E+04 | 1.79E+04          |
|              | 23       | 1,25E+06 | 6,66E+04        | 1,03E+06   | 6.28E+04            | 5,79E+05  | 2.19E+04           | 7,43E+04 | 1.43E+04         | 2,99E+04 | 1.78E+04          | 6,25E+04 | 2.09E+04          |
|              | 26       | 1,17E+06 | 4,86E+04        | 8,64E+05   | 6.54E+03            | 6,05E+05  | 4.05E+04           | 6,75E+04 | 8.19E+03         | 2,81E+04 | 6.94E+03          | 3,20E+04 | 4.35E+03          |
|              | 35       | 1,35E+06 | 1,20E+05        | 1,08E+06   | 8.35E+04            | 6,20E+05  | 5.85E+04           | 8,03E+04 | 8.62E+03         | 2,27E+04 | 3.67E+03          | 5,32E+04 | 1.46E+04          |
| IN Stations  | Day      | GAM42a   | $\sigma$ GAM42a | SAR86-1245 | $\sigma$ SAR86-1245 | CF319a    | $\sigma$ CF319a    | POL740   | $\sigma$ POL740  | FORM181A | $\sigma$ FORM181A | CREN554  | $\sigma$ CREN554  |
|              | -1       | 7,52E+04 | 6.09E+03        | 1.03E+05   | 1.79E+02            | 2,89E+05  | 9.65E+04           | 4,78E+04 | 2.61E+04         | 2.61E+04 | 9.46E+03          | 4,85E+04 | 2.22E+04          |
|              | 5        | 1,24E+05 | 1.83E+04        | 8.61E+04   | 7.35E+03            | 2,49E+05  | 4.15E+04           | 5,49E+04 | 1.98E+04         | 1.09E+04 | 9.08E+02          | 2,29E+04 | 7.83E+03          |
|              | 9        | 6,99E+04 | 2.56E+04        | 7.65E+04   | 1.56E+04            | 2,24E+05  | 1.30E+04           | 3,68E+04 | 5.20E+03         | 2.95E+04 | 6.11E+03          | 3,29E+04 | 6.38E+03          |
|              | 14       | 1,47E+05 | 2.56E+04        | 8.86E+04   | 8.69E+03            | 2,03E+05  | 1.54E+04           | 5,38E+04 | 2.19E+04         | 1.86E+04 | 7.16E+03          | 4,75E+04 | 2.85E+03          |
|              | 18       | 1,42E+05 | 4.88E+04        | 9.70E+04   | 1.95E+04            | 3,13E+05  | 4.67E+04           | 3,91E+04 | 1.26E+04         | 2.97E+04 | 4.25E+03          | 2,90E+04 | 7.21E+03          |
|              | 22       | 9,80E+04 | 5.17E+04        | 1.34E+05   | 5.22E+03            | 2,45E+05  | 2.99E+04           | 4,85E+04 | 1.10E+04         | 2.43E+04 | 1.50E+04          | 3,67E+04 | 2.81E+04          |
|              | 27       | 1,02E+05 | 2.19E+04        | 1.09E+05   | 1.11E+04            | 2,20E+05  | 1.29E+04           | 3,52E+04 | 1.29E+04         | 2.31E+04 | 3.35E+03          | 3,33E+04 | 1.12E+04          |
| 36           | 9,46E+04 | 1.74E+04 | 1.11E+05        | 5.43E+03   | 1,93E+05            | 3.00E+04  | 3,40E+04           | 2.25E+04 | 1.90E+04         | 5.91E+03 | 2,93E+04          | 4.23E+03 |                   |
| OUT Stations | -1       | 7,52E+04 | 6.09E+03        | 1.03E+05   | 1.79E+02            | 2,89E+05  | 9.65E+04           | 4,78E+04 | 2.61E+04         | 2.61E+04 | 9.46E+03          | 4,85E+04 | 2.22E+04          |
|              | 4        | 9,68E+04 | 3.37E+04        | 1.11E+05   | 7.39E+03            | 2,51E+05  | 5.17E+03           | 3,86E+04 | 4.61E+03         | 2.46E+04 | 1.62E+04          | 7,09E+04 | 2.55E+04          |
|              | 8        | 4,91E+04 | 5.46E+03        | 4.86E+0    | 1.49E+03            | 8,77E+04  | 1.57E+04           | 2,02E+04 | 4.83E+03         | 1.77E+04 | 3.75E+03          | 2,39E+04 | 1.10E+04          |
|              | 16       | 9,61E+04 | 2.24E+04        | 1.12E+05   | 5.19E+03            | 1,78E+05  | 4.31E+03           | 3,55E+04 | 1.33E+04         | 2.29E+04 | 1.79E+03          | 4,08E+04 | 1.59E+03          |
|              | 23       | 1,10E+05 | 3.56E+04        | 1.12E+05   | 2.07E+04            | 1,90E+05  | 4.60E+03           | 4,32E+04 | 3.95E+03         | 3.09E+04 | 2.65E+03          | 6,02E+04 | 8.15E+03          |
|              | 26       | 9,51E+04 | 1.83E+04        | 7.62E+04   | 3.81E+03            | 1,83E+05  | 3.23E+04           | 3,87E+04 | 2.88E+04         | 2.90E+04 | 4.18E+03          | 4,43E+04 | 4.35E+04          |
|              | 35       | 1,16E+05 | 4.03E+04        | 9.91E+04   | 1.06E+04            | 2,25E+05  | 4.50E+04           | 3,94E+04 | 7.82E+03         | 2.84E+04 | 1.00E+04          | 5,76E+04 | 1.09E+03          |
