# Supplementary material
Source: PubMed Central journal article supplement (PMC3502927)
Supplement: AEM.01814-12_zam999103931so2.pdf [file AEM.01814-12_zam999103931so2.pdf]

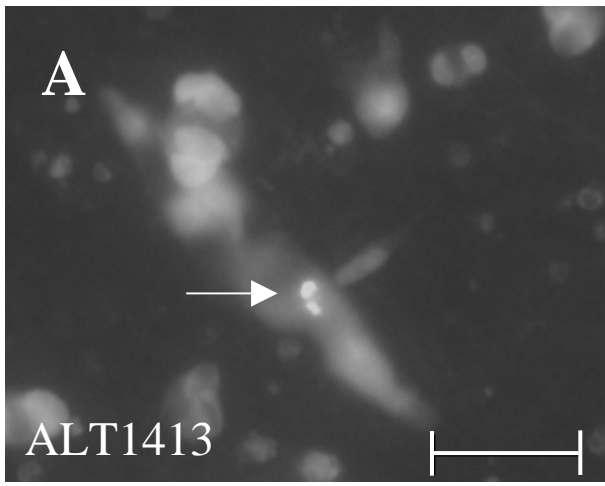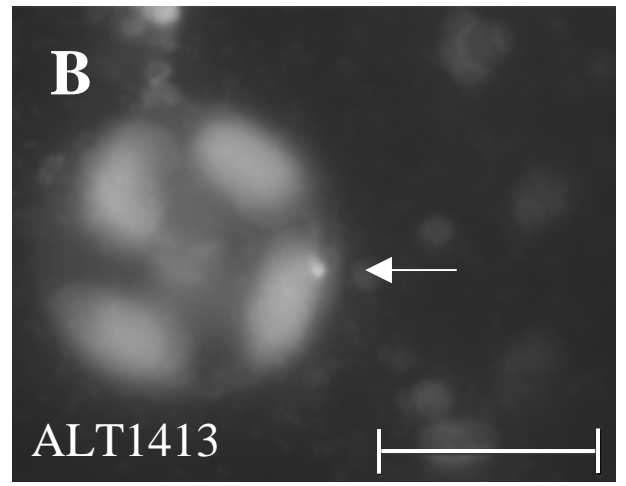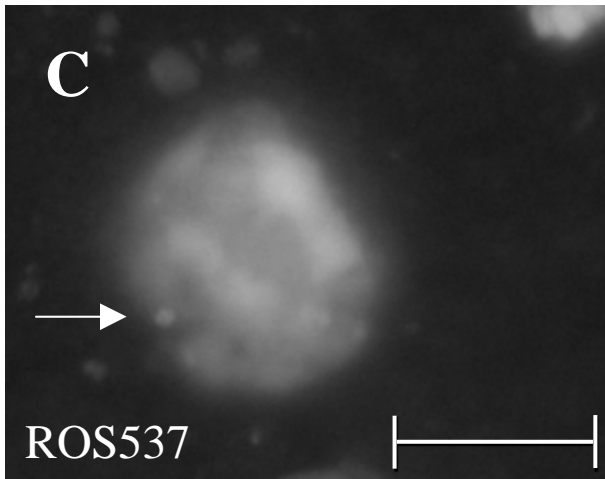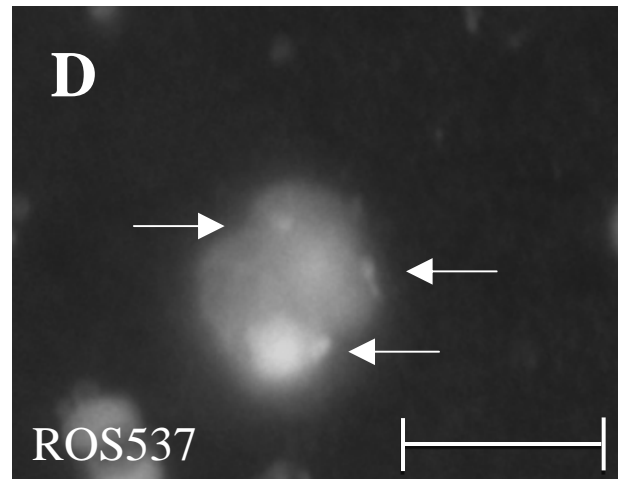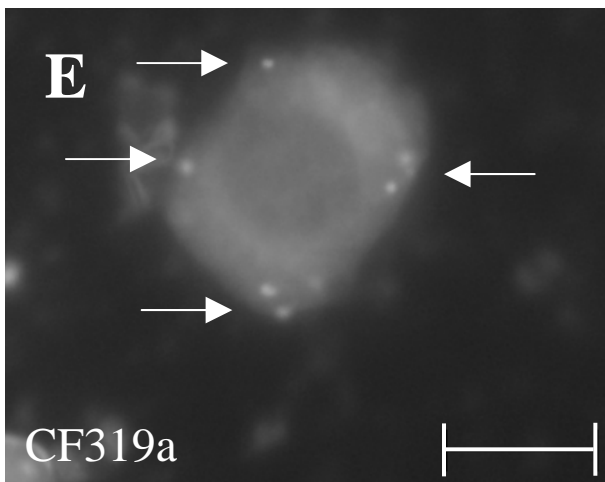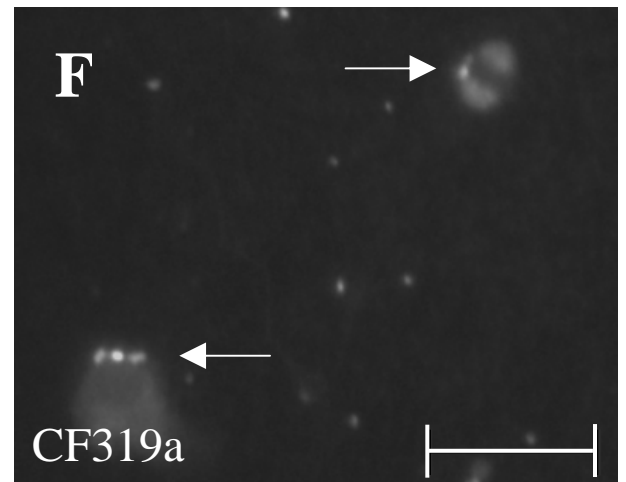

**FIG. S1:** Pictures of heterotrophic nanoflagellates with ingested cells of *Alteromonas* (A+B; probe ALT1413) (Eilers et al., 2000), *Roseobacter* (C+D) and *Bacteroidetes* (E+F) from inside the patch at different stations. Ingested cells are marked with arrows. The scale bars mark 10  $\mu$ m.
